# Supplementary material for: A Retrospective Controlled Cohort Study of the Impact of Glucocorticoid Treatment in SARS-CoV-2 Infection Mortality
Source: PubMed Central journal article supplement (PMC7449182; doi:10.1128/aac.01168-20), 2020-08-20
Supplement: AAC.01168-20-s0001.pdf [file AAC.01168-20-s0001.pdf]

**Appendix Table 1. Comparison between survivors and non-survivors**

| <b>N=463</b>                         | <b>Non-</b>      |                  | <b>p value</b>    |
|--------------------------------------|------------------|------------------|-------------------|
|                                      | <b>Survivors</b> | <b>survivors</b> |                   |
|                                      | <b>(N =392)</b>  | <b>(N = 71)</b>  |                   |
| Gender (Men), n (%)                  | 270 (68.9)       | 47 (66.2)        | 0.678             |
| Age, Mean (SD)                       | 63.6 (12.6)      | 77.8 (10.4)      | <b>&lt; 0.001</b> |
| Charlson score, Mean (SD)            | 3..6 (2..8)      | 1.7 (2..1)       | <b>&lt; 0.001</b> |
| Underlying Medical Conditions, n (%) | 294 (75.0)       | 65 (91.5)        | <b>0.002</b>      |
| High Blood pressure                  | 165 (42.1)       | 49 (69.0)        | <b>&lt; 0.001</b> |
| Ischemic heart disease               | 59 (15.1)        | 25 (35.2)        | <b>&lt; 0.001</b> |
| Diabetes                             | 70 (17.9)        | 27 (38.0)        | <b>&lt; 0.001</b> |
| Obesity                              | 30 (7.7)         | 5 (7.0)          | 0.858             |
| Dyslipidemia                         | 105 (26.8)       | 30 (42.3)        | <b>0.011</b>      |
| Cardiovascular risk factors          | 240 (61.5)       | 57 (80.3)        | <b>0.003</b>      |
| Chronic kidney disease               | 12 (3.1)         | 16 (22.5)        | <b>&lt; 0.001</b> |
| Onco-hematologic                     | 47 (12.0)        | 18 (25.4)        | <b>0.005</b>      |
| COPD                                 | 70 (17.9)        | 11 (15.5)        | 0.735             |
| Transplant (SOT/SCT)                 | 4 (1.0)          | 6 (8.5)          | <b>0.001</b>      |
| Neurologic                           | 31 (7.9)         | 15 (21.1)        | <b>0.002</b>      |
| Rheumatologic                        | 13 (3.3)         | 2 (2.8)          | 0.827             |
| Liver disease                        | 12 (3.1)         | 3 (4.2)          | 0.712             |
| Peptic Ulcer disease                 | 4 (1.0)          | 2 (2.8)          | 0.231             |
| Thromboembolic disease               | 6 (1.5)          | 2 (2.8)          | 0.354             |

|                                                              |            |           |                   |
|--------------------------------------------------------------|------------|-----------|-------------------|
| Thyroid disorders                                            | 18 (14.6)  | 2 (2.8)   | 0.494             |
| Immunosuppression                                            | 31 (7.9)   | 10 (14.1) | 0.110             |
| <hr/>                                                        |            |           |                   |
| Clinical symptoms, n (%)                                     |            |           |                   |
| Cough                                                        | 304 (78.1) | 52 (74.3) | 0.533             |
| Fever                                                        | 344 (88.9) | 65 (91.5) | 0.676             |
| Dyspnea                                                      | 254 (65.3) | 60 (84.5) | <b>0.001</b>      |
| Gastrointestinal                                             | 94 (24.0)  | 11 (15.5) | 0.126             |
| Sore throat                                                  | 22 (5.6)   | 4 (5.6)   | 0.994             |
| Anosmia/ageusia                                              | 29 (7.4)   | 4 (5.6)   | 0.803             |
| Myalgia                                                      | 86 (21.9)  | 8 (11.3)  | <b>0.038</b>      |
| Headache                                                     | 32 (8.2)   | 1 (1.4)   | <b>0.043</b>      |
| Fatigue                                                      | 68 (17.3)  | 10 (14.1) | 0.606             |
| Chest pain                                                   | 23 (5.9)   | 3 (4.2)   | 0.782             |
| Rash                                                         | 2 (0.5)    | 0         | 0.546             |
| Increased sputum production                                  | 10 (2.6)   | 1 (1.4)   | 0.561             |
| Confusion                                                    | 14 (3.7)   | 14 (20.3) | <b>&lt; 0.001</b> |
| <hr/>                                                        |            |           |                   |
| Days from onset of symptoms to diagnosis, Mean (SD)          | 8.5 (5.0)  | 6.7 (4.0) | <b>0.006</b>      |
| <hr/>                                                        |            |           |                   |
| Days from onset of symptoms to hospital admission, Mean (SD) | 7.8 (4.1)  | 6.3 (3.8) | <b>0.007</b>      |
| <hr/>                                                        |            |           |                   |
| Days from onset of symptoms to therapy, Mean (SD)            | 7.6 (4.1)  | 6.2 (3.6) | <b>0.001</b>      |
| <hr/>                                                        |            |           |                   |
| Days from onset of symptoms to steroids, Mean (SD)           | 11.2 (4.9) | 8.6 (3.7) | <b>&lt;0.001</b>  |
| <hr/>                                                        |            |           |                   |
| Treatment, n (%)                                             |            |           |                   |

|                                                 |                  |                  |                   |
|-------------------------------------------------|------------------|------------------|-------------------|
| Hydroxychloroquine                              | 388 (99.2)       | 67 (94.4)        | <b>0.010</b>      |
| Lopinavir/Ritonavir                             | 290 (74.6)       | 39 (54.9)        | <b>0.001</b>      |
| Azithromycin                                    | 195 (51.2)       | 42 (59.2)        | 0.245             |
| Interferon                                      | 187 (48.2)       | 27 (38.6)        | 0.153             |
| Tocilizumab                                     | 165 (42.4)       | 24 (34.3)        | 0.236             |
| Anakinra                                        | 7 (1.8)          | 1 (1.4)          | 0.822             |
| Other treatments                                | 69 (17.6)        | 16 (22.5)        | 0.321             |
| PaO <sub>2</sub> /FiO <sub>2</sub> , Mean (SD)  | 276 (104)        | 193 (99)         | <b>&lt; 0.001</b> |
| SatO <sub>2</sub> /FiO <sub>2</sub> , Mean (SD) | 294 (116)        | 219 (111)        | <b>&lt; 0.001</b> |
| Brescia-COVID19 $\geq 2$ , n (%)                | 62 (15.8)        | 31 (43.7)        | <b>&lt; 0.001</b> |
| ARDS, n (%)                                     |                  |                  |                   |
| No                                              | 155 (39.5)       | 10 (14.1)        |                   |
| Mild                                            | 125 (31.8)       | 14 (19.7)        |                   |
| Moderate                                        | 93 (23.7)        | 38 (53.5)        | <b>&lt; 0.001</b> |
| Severe                                          | 19 (4.8)         | 9 (12.7)         |                   |
| Admitted to ICU at D0                           | 27 (6.9%)        | 3 (4.2%)         | 0.600             |
| Laboratory outcomes, Mean (SD)                  |                  |                  |                   |
| Lymphocytes                                     | 1.077<br>(1,413) | 796 (533)        | 0.133             |
| Lactate dehydrogenase                           | 376 (132)        | 459 (221)        | <b>&lt; 0.001</b> |
| D Dimer                                         | 1.98 (5.87)      | 4.89<br>(12.09)  | <b>0.010</b>      |
| C-reactive protein                              | 133 (84)         | 164 (78)         | <b>0.010</b>      |
| Ferritin                                        | 1.092 (868)      | 2,563<br>(5.308) | <b>0.271</b>      |

|                                         |                   |                  |                   |
|-----------------------------------------|-------------------|------------------|-------------------|
| Interleukin 6 ( <b>IL-6</b> )           | 169 (217)         | 254 (212)        | 0.294             |
| <hr/>                                   |                   |                  |                   |
| Chest CT (at hospital admission), n (%) |                   |                  |                   |
| Normal imaging                          | 16 (4,2)          | 2 (2,9)          |                   |
| Unilateral pneumonia                    | 38 (9.9)          | 3 (4.3)          |                   |
| Bilateral interstitial pneumonia        | 213 (55.3)        | 31 (44.9)        | <b>&lt; 0.001</b> |
| Patchy bilateral pneumonia              | 94 (24.4)         | 15 (21.9)        |                   |
| Confluent bilateral pneumonia           | 24 (6.2)          | 18 (26.1)        |                   |
| <hr/>                                   |                   |                  |                   |
| <b>Steroid treatment, n (%)</b>         | <b>341 (87.0)</b> | <b>55 (77.5)</b> | <b>0.044</b>      |
| <hr/>                                   |                   |                  |                   |

**Appendix Table 2. Baseline demographic and clinical characteristics of the patients according to initial steroid regimen**

| <b>N=396</b>                                | <b>1 mg/kg/day Cohort<br/>(N=310)</b> | <b>Pulses Cohort<br/>(N=86)</b> | <b>p value</b> |
|---------------------------------------------|---------------------------------------|---------------------------------|----------------|
| Gender (Men), n (%)                         | 213 (68.7%)                           | 63 (73.3%)                      | 0.417          |
| Age, Mean (SD)                              | 65.3 (13.0)                           | 65.8 (12.2)                     | 0.775          |
| Charlson score, Mean (SD)                   | 2.03 (2.2)                            | 2.00 (2.3)                      | 0.916          |
| <b>Underlying Medical Conditions, n (%)</b> |                                       |                                 |                |
| High Blood pressure                         | 148 (47.7%)                           | 34 (39.5%)                      | 0.177          |
| Ischemic heart disease                      | 63 (20.3%)                            | 9 (10.5%)                       | <b>0.036</b>   |
| Diabetes                                    | 65 (21%)                              | 19 (22.1%)                      | 0.821          |
| Obesity                                     | 24 (7.7%)                             | 5 (5.8%)                        | 0.544          |
| Dyslipidemia                                | 90 (29%)                              | 23 (26.7%)                      | 0.678          |
| Cardiovascular risk factors                 | 204 (66.2%)                           | 45 (52.3%)                      | <b>0.018</b>   |
| Chronic kidney disease                      | 19 (6.1%)                             | 5 (5.8%)                        | 0.914          |
| Onco-hematologic                            | 34 (11%)                              | 15 (17.4%)                      | 0.107          |
| COPD                                        | 53 (17.1%)                            | 18 (20.9%)                      | 0.412          |
| Transplant (SOT/SCT)                        | 8 (2.6%)                              | 1 (1.2%)                        | 0.435          |
| Neurologic                                  | 24 (7.7%)                             | 11 (12.8%)                      | 0.144          |
| Rheumatologic                               | 8 (2.6%)                              | 6 (7%)                          | 0.051          |
| Liver disease                               | 8 (2.6%)                              | 2 (2.3%)                        | 0.894          |
| Peptic Ulcer disease                        | 2 (0.6%)                              | 1 (1.2%)                        | 0.624          |
| Thromboembolic disease                      | 4 (1.3%)                              | 1 (1.2%)                        | 0.925          |
| Thyroid disorders                           | 11 (3.5%)                             | 4 (4.7%)                        | 0.636          |
| Immunosuppression                           | 29 (9.4%)                             | 8 (9.3%)                        | 0.981          |

| Clinical symptoms at admission, n (%)                           |             |             |              |
|-----------------------------------------------------------------|-------------|-------------|--------------|
| Cough                                                           | 245 (80.1%) | 67 (77.9%)  | 0.661        |
| Fever                                                           | 281 (91.5%) | 72 (85.7%)  | 0.111        |
| Dyspnea                                                         | 219 (71.3%) | 53 (61.6%)  | 0.085        |
| Gastrointestinal                                                | 75 (24.2%)  | 17 (19.8%)  | 0.390        |
| Sore throat                                                     | 18 (5.8%)   | 4 (4.7%)    | 0.679        |
| Anosmia/ageusia                                                 | 20 (6.5%)   | 8 (9.3%)    | 0.362        |
| Myalgia                                                         | 66 (21.3%)  | 16 (18.6%)  | 0.587        |
| Headache                                                        | 25 (8.1%)   | 4 (4.7%)    | 0.282        |
| Fatigue                                                         | 44 (14.2%)  | 19 (22.1%)  | 0.076        |
| Chest pain                                                      | 17 (5.5%)   | 6 (7%)      | 0.600        |
| Rash                                                            | 2 (0.6%)    | 0 (0%)      | 0.455        |
| Increased sputum production                                     | 3 (1%)      | 3 (3.5%)    | 0.090        |
| Confusion                                                       | 10 (3.3%)   | 8 (9.4%)    | <b>0.018</b> |
| <hr/>                                                           |             |             |              |
| Days from onset of symptoms to diagnosis,<br>Mean (SD)          | 8.5 (5.4)   | 8.5 (4.0)   | 0.985        |
| <hr/>                                                           |             |             |              |
| Days from onset of symptoms to hospital<br>admission, Mean (SD) | 7.5 (4.2)   | 8.3 (4.1)   | 0.118        |
| <hr/>                                                           |             |             |              |
| Days from onset of symptoms to therapy,<br>Mean (SD)            | 7.4 (4.2)   | 7.7 (3.8)   | 0.599        |
| <hr/>                                                           |             |             |              |
| Days from onset of symptoms to steroids,<br>mean (SD)           | 10.7 (5.0)  | 11.32 (4.0) | 0.307        |
| <hr/>                                                           |             |             |              |
| Number of Pulses, Mean (SD)                                     | *3.3 (2.0)  | 3.5 (2.0)   | 0.522        |

|                                                  |               |               |              |
|--------------------------------------------------|---------------|---------------|--------------|
| Pulse dose                                       | *             |               | <b>0.015</b> |
| <250 mg                                          | 7 (10.3%)     | 24 (15.8%)    |              |
| 250 mg                                           | 46 (67.6%)    | 49 (51.6%)    |              |
| > 500 mg                                         | 15 (22.1%)    | 11 (13.1%)    |              |
| Days from steroid 1mg/kg/d to pulses*, Mean (SD) | 4.9 (3.7)     | N/A           |              |
| Treatment, n (%)                                 |               |               |              |
| Hydroxychloroquine                               | 307 (99.4%)   | 86 (100%)     | 0.454        |
| Lopinavir/Ritonavir                              | 222 (72.1%)   | 65 (76.5%)    | 0.419        |
| Azithromycin                                     | 159 (52.8%)   | 49 (57.6%)    | 0.431        |
| Interferon                                       | 146 (47.9%)   | 40 (46.5%)    | 0.903        |
| -before or together with steroids                | 138 (93.9%)   | 33 (94.3%)    | 0.999        |
| -after steroids                                  | 9 (6.1%)      | 2 (5.7%)      |              |
| Tocilizumab                                      | 130 (42.2%)   | 47 (54.7%)    | 0.05         |
| -before or together with steroids                | 77 (59.7%)    | 25 (59.5%)    | 0.999        |
| -after steroids                                  | 52 (40.3%)    | 17 (40.5%)    |              |
| Anakinra                                         | 4 (1.3%)      | 4 (4.7%)      | 0.071        |
| -before or together with steroids                | 2 (66.7%)     | 0             | 0.4          |
| -after steroids                                  | 1 (33.3%)     | 3 (75%)       |              |
| Other treatments**                               |               |               |              |
| PaO <sub>2</sub> /FiO <sub>2</sub> , Mean (SD)   | 261.4 (110.4) | 270.5 (118.4) | 0.544        |
| SatO <sub>2</sub> /FiO <sub>2</sub> , Mean (SD)  | 286.7 (123.6) | 300.6 (125.6) | 0.543        |
| Brescia-COVID19 <sub>≥2</sub> , n (%)            | 62 (20%)      | 15 (17.4%)    | 0.596        |

|                                         |                   |                |       |
|-----------------------------------------|-------------------|----------------|-------|
| ARDS, n (%)                             |                   |                | 0.110 |
| No                                      | 115 (37.1%)       | 40 (46.5%)     |       |
| Mild                                    | 82 (26.5%)        | 14 (16.3%)     |       |
| Moderate/ Severe                        | 113 (36.5%)       | 32 (37.2%)     |       |
| Admitted to ICU at D0                   | 28 (9%)           | 2 (2.3%)       | 0.038 |
| Laboratory (day 0), Mean (SD)           |                   |                |       |
| Lymphocyte counts                       | 1040.6 (1522 (1)) | 879.2 (412.0)  | 0.384 |
| Lactate dehydrogenase                   | 396.7 (157.7)     | 395.6 (141.5)  | 0.963 |
| D- Dimer                                | 2.1 (6.4)         | 3.6 (10.6)     | 0.295 |
| C-reactive protein                      | 139.6 (84.0)      | 145.7 (88.4)   | 0.611 |
| Ferritin                                | 1486.8 (2589.2)   | 1042.7 (783.6) | 0.340 |
| Interleukin 6 (IL-6)                    | 195.1 (230.3)     | 201.1 (229.7)  | 0.921 |
| Chest CT (at hospital admission), n (%) |                   |                | 0.275 |
| Normal imaging                          | 14 (4.6%)         | 2 (2.4%)       |       |
| Unilateral pneumonia                    | 24 (7.9%)         | 5 (5.9%)       |       |
| Bilateral interstitial pneumonia        | 169 (55.6%)       | 48 (56.5%)     |       |
| Patchy bilateral pneumonia              | 75 (24.7%)        | 18 (21.2%)     |       |
| Confluent bilateral pneumonia           | 22 (7.2%)         | 12 (14.1%)     |       |

\*In 70 (22.6%) patients that received steroid pulses after a 1 mg/kg/day regimen \*\*Including DRVr/ doxycycline/ clarithromycin and other antibiotics

COPD: chronic obstructive pulmonary disease; SOT: solid organ transplantation; SCT: stem cell transplantation; D0: day 0; SD: standard deviation; N/A: non-applicable; PaO<sub>2</sub>/FiO<sub>2</sub>: arterial oxygen tension/inspiratory oxygen fraction; SatO<sub>2</sub>/FiO<sub>2</sub>: oxygen saturation /inspiratory oxygen



---

fraction; ICU: intensive care unit; ARDS: acute respiratory distress syndrome; Brescia-COVID19: respiratory severity scale Brescia-COVID-19; CT: computed tomography scan; IL-6: Interleukin 6; DRVr: ritonavir-boosted darunavir

**Appendix Table 3. Baseline demographic and clinical characteristics of the patients initially receiving 1 mg/kg/day according to subsequent need for steroid pulses**

| <b>N=310</b>                            | <b>1 mg/kg/day followed by<br/>steroid pulses<br/>(N=70)</b> | <b>1 mg/kg/d<br/>(N=240)</b> | <b>p<br/>value</b> |
|-----------------------------------------|--------------------------------------------------------------|------------------------------|--------------------|
| Gender (Men), n (%)                     | 50 (71.4%)                                                   | 163 (67.9%)                  | 0.577              |
| Age, Mean (SD)                          | 67.2 (12.7)                                                  | 64.8 (13.1)                  | 0.169              |
| Charlson score, Mean (SD)               | 2.4 (2.5)                                                    | 1.9 (2.2)                    | 0.102              |
| Underlying medical conditions,<br>n (%) | 58(82.8%)                                                    | 180 (75%)                    | 0.171              |
| High Blood pressure                     | 34 (48.5%)                                                   | 114 (47.5%)                  | 0.875              |
| Ischemic heart disease                  | 12 (17.1%)                                                   | 51 (21.2%)                   | 0.452              |
| Diabetes                                | 21 (30%)                                                     | 44 (18.3%)                   | <b>0.035</b>       |
| Obesity                                 | 6 (8.5%)                                                     | 18 (7.5%)                    | 0.768              |
| Dyslipidemia                            | 23 (32.8%)                                                   | 67 (27.9%)                   | 0.423              |
| Cardiovascular risk factors             | (68.11%)                                                     | 157 (65.6%)                  | 0.707              |
| Chronic kidney disease                  | 5 (7.1%)                                                     | 14 (5.8%)                    | 0.688              |
| Onco-hematologic                        | 10 (14.2%)                                                   | 24 (10%)                     | 0.313              |
| COPD                                    | 8 (11.4%)                                                    | 45 (18.7%)                   | 0.152              |
| Transplant (SOT/SCT)                    | 2 (2.8%)                                                     | 6 (2.5%)                     | 0.868              |
| Neurologic                              | 12 (17.1%)                                                   | 12 (5%)                      | <b>0.001</b>       |
| Rheumatologic                           | 3 (4.3%)                                                     | 5 (2.1%)                     | 0.386              |
| Liver disease                           | 2 (2.9%)                                                     | 6 (2.5%)                     | 0.999              |

|                                       |            |             |              |
|---------------------------------------|------------|-------------|--------------|
| Peptic Ulcer disease                  | 0          | 2 (0.8%)    | 0.999        |
| Thromboembolic disease                | 2 (2.9%)   | 2 (0.8%)    | 0.221        |
| Thyroid disorders                     | 2 (2.9%)   | 9 (3.8%)    | 0.999        |
| Immunosuppression                     | 11 (15.9%) | 18 (7.5%)   | <b>0.034</b> |
| <hr/>                                 |            |             |              |
| Clinical symptoms at admission, n (%) |            |             |              |
| Cough                                 | 55 (80.9%) | 190 (79.8%) | 0.999        |
| Fever                                 | 64 (92.7)  | 217 (91.2%) | 0.679        |
| Dyspnea                               | 54 (79.4%) | 165 (69%)   | 0.095        |
| Gastrointestinal                      | 15 (21.4%) | 60 (25%)    | 0.635        |
| Sore throat                           | 5 (7.1%)   | 13 (5.4%)   | 0.567        |
| Anosmia/ageusia                       | 6 (8.6%)   | 14 (5.8%)   | 0.412        |
| Myalgia                               | 11 (15.7%) | 55 (22.9%)  | 0.246        |
| Headache                              | 3 (4.3%)   | 22 (9.2%)   | 0.222        |
| Fatigue                               | 10 (14.3%) | 34 (14.2%)  | 0.999        |
| Chest pain                            | 6 (8.6%)   | 11 (4.6%)   | 0.231        |
| Rash                                  | 0          | 2 (0.8%)    | 0.999        |
| Increased sputum production           | 1 (1.4%)   | 2 (0.8%)    | 0.537        |
| Confusion                             | 4 (6.1%)   | 6 (2.5%)    | 0.234        |
| <hr/>                                 |            |             |              |
| Days from onset of symptoms           | 8.5 (4.9)  | 8.5 (5.5)   | 0.972        |
| t to diagnosis, Mean (SD)             |            |             |              |
| (Range)                               |            |             |              |
| <hr/>                                 |            |             |              |

|                                                                    |                          |                          |              |
|--------------------------------------------------------------------|--------------------------|--------------------------|--------------|
| Days from onset of symptoms<br>to hospital admission, Mean<br>(SD) | 7.5 (4.3)                | 7.5 (4.2)                | 0.940        |
| Days from onset of symptoms<br>to therapy, Mean (SD)               | 7.3 (4.2)                | 7.4 (4.2)                | 0.869        |
| Days from onset of symptoms<br>to steroids, Mean (SD)              | 9.3 (4.4)                | 11.1 (5.1)               | <b>0.010</b> |
| Days from steroid 1mg/kg/day<br>to pulses* mean (SD)               | 4.9 (3.7)                | N/A                      |              |
| Treatment, n (%)                                                   |                          |                          |              |
| Hydroxychloroquine                                                 | 69 (100%)                | 238 (99.2%)              | 0.999        |
| Lopinavir/Ritonavir                                                | 48 (70.6%)               | 174 (72.5%)              | 0.761        |
| Azithromycin                                                       | 41 (61.2%)               | 118 (50.4%)              | 0.129        |
| Interferon                                                         | 40 (57.9%)               | 106 (44.9%)              | 0.056        |
| -before or together with<br>steroids                               | 34 (82.9%)<br>7 (17.1%)  | 104 (98.1%)<br>2 (1.9%)  | <b>0.002</b> |
| -after steroids                                                    |                          |                          |              |
| Tocilizumab                                                        | 48 (68.5%)               | 82 (34.4%)               | <b>0.000</b> |
| -before or together with<br>steroids                               | 18 (37.5%)<br>30 (62.5%) | 59 (72.8%)<br>22 (27.2%) | <b>0.000</b> |
| -after steroids                                                    |                          |                          |              |
| Anakinra                                                           | 2                        | 1                        | 0.999        |
| -before or together with<br>steroids                               | 1 (50%)<br>1 (50%)       | 1 (100%)<br>0            |              |

-after steroids

|                                                 |                 |                   |              |
|-------------------------------------------------|-----------------|-------------------|--------------|
| Other treatments**                              | 13 (18.6%)      | 33 (13.8%)        | 0.341        |
| PaO <sub>2</sub> /FiO <sub>2</sub> , Mean (SD)  | 233.4 (111.5)   | 271.6 (108.5)     | <b>0.017</b> |
| SatO <sub>2</sub> /FiO <sub>2</sub> , Mean (SD) | 250.8 (135.7)   | 298.2 (117.9)     | 0.055        |
| Brescia-COVID19 <sub>≥2</sub> , n (%)           | 18 (25.7%)      | 44 (18.3%)        | 0.174        |
| ARDS, n (%)                                     |                 |                   | <b>0.017</b> |
| No                                              | 16 (22.9%)      | 99 (41.3%)        |              |
| Mild                                            | 21 (30%)        | 61 (25.4%)        |              |
| Moderate/ Severe                                | 33 (47.1%)      | 80 (33.3%)        |              |
| Admitted to ICU at D0                           | 5 (7.1%)        | 23 (9.6%)         | 0.641        |
| Laboratory (D0), Mean (SD)                      |                 |                   |              |
| Lymphocyte counts                               | 1247.8 (2492.6) | 970.4<br>(1002.0) | 0.404        |
| Lactate dehydrogenase                           | 437.4 (157.9)   | 382.7(155.6)      | 0.021        |
| D- Dimer                                        | 2.0 (3.6)       | 2.2 (7.1)         | 0.902        |
| C-reactive protein                              | 165.4 (79.3)    | 130.5 (84.0)      | 0.05         |
| Ferritin                                        | 1070 (838.4)    | 1633<br>(2973.4)  | 0.369        |
| Interleukin 6 (IL-6)                            | 232.2 (246.6)   | 181.2 (225.5)     | 0.470        |
| Chest CT (at hospital admission), n (%)         |                 |                   | <b>0.029</b> |
| Normal imaging                                  | 3 (4.4%)        | 11 (4.7%)         |              |
| Unilateral pneumonia                            | 4 (5.9%)        | 20 (8.5%)         |              |

|                                  |            |             |
|----------------------------------|------------|-------------|
| Bilateral interstitial pneumonia | 36 (52.9%) | 133 (56.4%) |
| Patchy bilateral pneumonia       | 14 (20.6%) | 61 (25.8%)  |
| Confluent bilateral pneumonia    | 11 (16.2%) | 11 (4.7%)   |

---

\*In 70 (22.6%) patients that received steroid pulses after a 1 mg/kg/day regimen

\*\*Including DRVr/ doxycycline/ clarithromycin and other antibiotics.

COPD: chronic obstructive pulmonary disease; SOT: solid organ

transplantation; SCT: stem cell transplantation; ICU: intensive care unit; D0:

day 0; SD: standard deviation; N/A: non-applicable; PaO<sub>2</sub>/FiO<sub>2</sub>: arterial oxygen

tension/inspiratory oxygen fraction; SatO<sub>2</sub>/FiO<sub>2</sub>: oxygen saturation /inspiratory

oxygen fraction; ARDS: acute respiratory distress syndrome; Brescia-COVID19:

respiratory severity scale Brescia-COVID-19; CT: computed tomography scan;

IL-6: Interleukin 6; DRVr: ritonavir-boosted darunavir

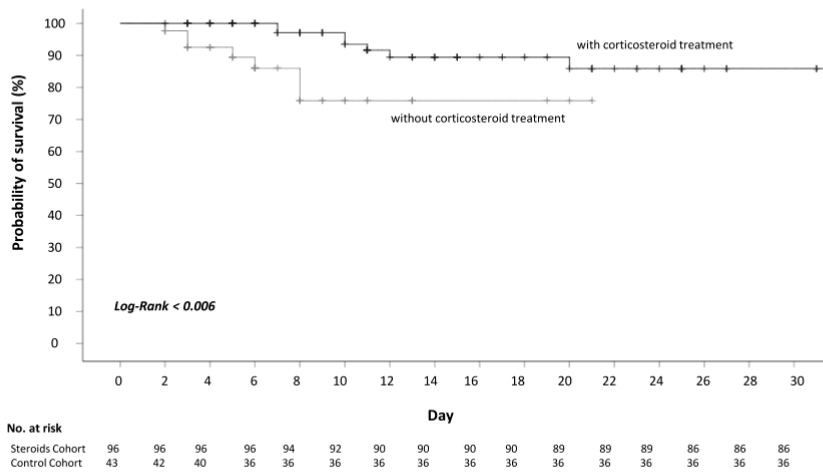

Appendix Figure 1. Probability of survival from D0 to hospital discharge of patients with SARS-COV-2 infection, according steroid exposure (Mild ARDS).

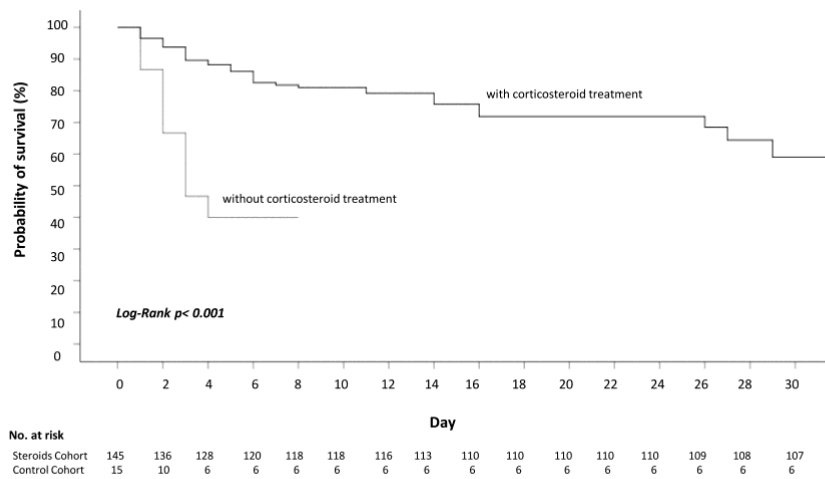

Appendix Figure 2. Probability of survival from D0 to hospital discharge of patients with SARS-COV-2 infection, according to steroid exposure (Moderate-severe ARDS).
